# Supplementary material for: The Role of Insulin Resistance in the Development of Complications after Coronary Artery Bypass Grafting in Patients with Coronary Artery Disease
Source: MDPI journal article supplement (doi:10.3390/biomedicines11112977), 2023-11-05
Supplement: s1 [file s1]

## Supplement

Suppl. Table S1 **Model Summary for four different variants of binary logistic regression**

| step                                                                                                  | -2 Log likelihood    | Cox and Snell R Square | Nagelkerke R Square |
|-------------------------------------------------------------------------------------------------------|----------------------|------------------------|---------------------|
| <b>Significant Complications</b>                                                                      |                      |                        |                     |
| 1                                                                                                     | 161.278 <sup>a</sup> | .036                   | .056                |
| a. Estimation terminated at iteration number 4 because parameter estimates changed by less than .001. |                      |                        |                     |
| <b>Hospital stay after CABG &gt;10 days</b>                                                           |                      |                        |                     |
| 1                                                                                                     | 145.013 <sup>a</sup> | .144                   | .219                |
| 2                                                                                                     | 134.927 <sup>a</sup> | .197                   | .299                |
| 3                                                                                                     | 130.901 <sup>a</sup> | .217                   | .330                |
| a. Estimation terminated at iteration number 6 because parameter estimates changed by less than .001. |                      |                        |                     |
| <b>Hospital stay after CABG &gt;14 days</b>                                                           |                      |                        |                     |
| 1                                                                                                     | 176.018 <sup>a</sup> | .067                   | .096                |
| 2                                                                                                     | 169.882 <sup>a</sup> | .102                   | .147                |
| 3                                                                                                     | 166.037 <sup>b</sup> | .124                   | .178                |
| a. Estimation terminated at iteration number 4 because parameter estimates changed by less than .001. |                      |                        |                     |
| b. Estimation terminated at iteration number 5 because parameter estimates changed by less than .001. |                      |                        |                     |
| <b>Combined end point<br/>(significant complications or a hospital stay after CABG &gt;10 days)</b>   |                      |                        |                     |
| 1                                                                                                     | 142.293 <sup>a</sup> | .117                   | .182                |
| 2                                                                                                     | 134.596 <sup>a</sup> | .159                   | .248                |
| 3                                                                                                     | 127.851 <sup>a</sup> | .194                   | .303                |
| 4                                                                                                     | 123.596 <sup>a</sup> | .215                   | .336                |
| a. Estimation terminated at iteration number 6 because parameter estimates changed by less than .001. |                      |                        |                     |

Suppl. Table S2. **Omnibus Tests of Model Coefficients** for four different variants of binary logistic regression

|                                                                                                |       | Chi-square | df | Sig. |
|------------------------------------------------------------------------------------------------|-------|------------|----|------|
| <b>Significant complications</b>                                                               |       |            |    |      |
| Step 1                                                                                         | step  | 5,830      | 1  | .016 |
|                                                                                                | block | 5,830      | 1  | .016 |
|                                                                                                | Model | 5,830      | 1  | .016 |
| <b>Hospital stay after CABG &gt;10 days</b>                                                    |       |            |    |      |
| Step 3                                                                                         | step  | 4.026      | 1  | .045 |
|                                                                                                | block | 38.685     | 3  | .000 |
|                                                                                                | Model | 38.685     | 3  | .000 |
| <b>Hospital stay after CABG &gt;14 days</b>                                                    |       |            |    |      |
| Step 3                                                                                         | step  | 3.844      | 1  | .050 |
|                                                                                                | block | 20.881     | 3  | .000 |
|                                                                                                | Model | 20.881     | 3  | .000 |
| <b>Combined endpoint (significant complications or a hospital stay after CABG &gt;10 days)</b> |       |            |    |      |
| Step 4                                                                                         | step  | 4.256      | 1  | .039 |
|                                                                                                | block | 38.337     | 4  | .000 |
|                                                                                                | Model | 38.337     | 4  | .000 |

Suppl. Table S3. **Classification Table** for four different variants of binary logistic regression

|                                       | Observed                                                                            |   | Predicted                                                                           |     |                          |
|---------------------------------------|-------------------------------------------------------------------------------------|---|-------------------------------------------------------------------------------------|-----|--------------------------|
|                                       |                                                                                     |   | Significant complications                                                           |     | Percentage<br>Correction |
|                                       |                                                                                     |   | 0                                                                                   | 1   |                          |
| Step 1                                | Significant Complications                                                           | 0 | 123                                                                                 | 0   | 100.0                    |
|                                       |                                                                                     | 1 | 35                                                                                  | 0   | .0                       |
|                                       | overall Percentage                                                                  |   |                                                                                     |     | 77.8                     |
|                                       |                                                                                     |   | Hospital stay after CABG >10 days                                                   |     |                          |
| Step 3                                | Hospital stay after CABG >10 days                                                   | 0 | 0                                                                                   | 36  | .0                       |
|                                       |                                                                                     | 1 | 0                                                                                   | 122 | 100.0                    |
|                                       | overall Percentage                                                                  |   |                                                                                     |     | 77.2                     |
|                                       |                                                                                     |   | Hospital stay after CABG >14 days                                                   |     |                          |
| Step3                                 | Hospital stay after CABG >14 days                                                   | 0 | 114                                                                                 | 0   | 100.0                    |
|                                       |                                                                                     | 1 | 44                                                                                  | 0   | .0                       |
|                                       | overall Percentage                                                                  |   |                                                                                     |     | 72.2                     |
|                                       |                                                                                     |   | Combined end point (significant complications or hospital stay after CABG >10 days) |     |                          |
| Step 4                                | Combined end point (significant complications or hospital stay after CABG >10 days) | 0 | 10                                                                                  | 23  | 30.3                     |
|                                       |                                                                                     | 1 | 11                                                                                  | 114 | 91.2                     |
|                                       | overall Percentage                                                                  |   |                                                                                     |     | 78.5                     |
| a. Constant is included in the model. |                                                                                     |   |                                                                                     |     |                          |
| b. The cut value is .500              |                                                                                     |   |                                                                                     |     |                          |
